# Supplementary material for: Initial antihypertensive agent effects on acute blood pressure after intracerebral haemorrhage
Source: HighWire-hosted journal article supplement (doi:10.1136/svn-2021-001101), 2022-04-20
Supplement: svn-2021-001101supp001_data_supplement.pdf [file svn-2021-001101supp001_data_supplement.pdf]

**Supplemental Table 1.** Multiple linear/logistic regression models of secondary outcomes, adjusted for covariates. Note: %, percentage; CI, confidence interval; HE, hematoma expansion; mL, milliliters; mmHg, millimeters of mercury; mRS, modified Rankin Score; OR, odds ratio; vs, versus.

| <b>Outcome</b>               | <b>Predictor</b>             | <b>Mean/OR (95% CI)</b> | <b>p value</b> |
|------------------------------|------------------------------|-------------------------|----------------|
| <b>HE, mL*</b>               | <b>Antihypertensive used</b> |                         | 0.406          |
|                              | Hydralazine vs Labetalol     | 0.262 (-3.862, 4.386)   | 0.901          |
|                              | Hydralazine vs Nicardipine   | -1.118 (-5.117, 2.881)  | 0.583          |
|                              | Labetalol vs Nicardipine     | -1.38 (-3.446, 0.687)   | 0.190          |
| <b>6-month mortality</b>     | <b>Antihypertensive used</b> |                         | 0.118          |
|                              | Hydralazine vs Labetalol     | 0.358 (0.128, 1.001)    | 0.050          |
|                              | Hydralazine vs Nicardipine   | 0.346 (0.126, 0.948)    | <b>0.039</b>   |
|                              | Labetalol vs Nicardipine     | 0.966 (0.64, 1.459)     | 0.869          |
| <b>Length of Stay, days</b>  | <b>Antihypertensive used</b> |                         | <b>0.028</b>   |
|                              | Hydralazine vs Labetalol     | 2.514 (-2.291, 7.319)   | 0.305          |
|                              | Hydralazine vs Nicardipine   | -0.872 (-5.529, 3.785)  | 0.713          |
|                              | Labetalol vs Nicardipine     | -3.386 (-5.87, -0.902)  | <b>0.008</b>   |
| <b>Discharge mRS</b>         | <b>Antihypertensive used</b> |                         | 0.262          |
|                              | Hydralazine vs Labetalol     | 1.128 (0.601, 2.114)    | 0.708          |
|                              | Hydralazine vs Nicardipine   | 0.86 (0.466, 1.585)     | 0.628          |
|                              | Labetalol vs Nicardipine     | 0.763 (0.55, 1.056)     | 0.103          |
| <b>90-day mRS</b>            | <b>Antihypertensive used</b> |                         | 0.276          |
|                              | Hydralazine vs Labetalol     | 1.497 (0.753, 2.977)    | 0.250          |
|                              | Hydralazine vs Nicardipine   | 1.115 (0.576, 2.16)     | 0.746          |
|                              | Labetalol vs Nicardipine     | 0.745 (0.501, 1.108)    | 0.146          |
| <b>6-month mRS</b>           | <b>Antihypertensive used</b> |                         | 0.152          |
|                              | Hydralazine vs Labetalol     | 1.542 (0.744, 3.196)    | 0.244          |
|                              | Hydralazine vs Nicardipine   | 1.034 (0.514, 2.081)    | 0.925          |
|                              | Labetalol vs Nicardipine     | 0.671 (0.441, 1.02)     | 0.062          |
| <b>12-month mRS</b>          | <b>Antihypertensive used</b> |                         | 0.360          |
|                              | Hydralazine vs Labetalol     | 1.141 (0.503, 2.588)    | 0.752          |
|                              | Hydralazine vs Nicardipine   | 0.827 (0.377, 1.813)    | 0.634          |
|                              | Labetalol vs Nicardipine     | 0.724 (0.464, 1.131)    | 0.156          |
| <b>Discharge disposition</b> | <b>Antihypertensive used</b> |                         | 0.083          |
|                              | Hydralazine vs Labetalol     | 1.329 (0.613, 2.884)    | 0.471          |
|                              | Hydralazine vs Nicardipine   | 0.83 (0.398, 1.729)     | 0.618          |
|                              | Labetalol vs Nicardipine     | 0.624 (0.412, 0.945)    | <b>0.026</b>   |

**Supplemental Table 2.** Multiple linear/logistic regression models of outcomes, adjusted for covariates, stratified by race/ethnicity. Note: %, percentage; BP, blood pressure; CI, confidence interval; HE, hematoma expansion; mL, milliliters; mmHg, millimeters of mercury; mRS, modified Rankin Score; OR, odds ratio; vs, versus.

| Outcome                   | Race/ethnicity | Predictor                    | Mean/OR (95% CI)        | P value      |
|---------------------------|----------------|------------------------------|-------------------------|--------------|
| Systolic BP change, mmHg  | Black          | <b>Antihypertensive used</b> |                         | 0.401        |
|                           |                | Hydralazine vs Labetalol     | 4.077 (-14.882, 23.036) | 0.673        |
|                           |                | Hydralazine vs Nicardipine   | 8.431 (-10.068, 26.93)  | 0.371        |
|                           |                | Labetalol vs Nicardipine     | 4.354 (-3.219, 11.926)  | 0.259        |
|                           | Hispanic       | <b>Antihypertensive used</b> |                         | 0.663        |
|                           |                | Hydralazine vs Labetalol     | 4.118 (-10.789, 19.026) | 0.587        |
|                           |                | Hydralazine vs Nicardipine   | 6.102 (-8.055, 20.26)   | 0.397        |
|                           |                | Labetalol vs Nicardipine     | 1.984 (-6.174, 10.141)  | 0.633        |
|                           | White          | <b>Antihypertensive used</b> |                         | 0.495        |
|                           |                | Hydralazine vs Labetalol     | 5.458 (-9.09, 20.005)   | 0.460        |
|                           |                | Hydralazine vs Nicardipine   | 0.531 (-13.765, 14.828) | 0.942        |
|                           |                | Labetalol vs Nicardipine     | -4.927 (-13.603, 3.75)  | 0.264        |
| Diastolic BP change, mmHg | Black          | <b>Antihypertensive used</b> |                         | <b>0.046</b> |
|                           |                | Hydralazine vs Labetalol     | -5.247 (-20.126, 9.631) | 0.488        |
|                           |                | Hydralazine vs Nicardipine   | 2.293 (-12.224, 16.809) | 0.756        |
|                           |                | Labetalol vs Nicardipine     | 7.54 (1.581, 13.499)    | <b>0.013</b> |
|                           | Hispanic       | <b>Antihypertensive used</b> |                         | 0.134        |
|                           |                | Hydralazine vs Labetalol     | -2.303 (-11.007, 6.402) | 0.603        |
|                           |                | Hydralazine vs Nicardipine   | 2.537 (-5.73, 10.803)   | 0.546        |
|                           |                | Labetalol vs Nicardipine     | 4.839 (0.076, 9.602)    | <b>0.047</b> |
|                           | White          | <b>Antihypertensive used</b> |                         | 0.550        |
|                           |                | Hydralazine vs Labetalol     | -0.746 (-10.34, 8.849)  | 0.878        |
|                           |                | Hydralazine vs Nicardipine   | 2.371 (-7.058, 11.8)    | 0.621        |
|                           |                | Labetalol vs Nicardipine     | 3.117 (-2.606, 8.839)   | 0.284        |
| HE, mL                    | Black          | <b>Antihypertensive used</b> |                         | 0.464        |
|                           |                | Hydralazine vs Labetalol     | 1.863 (-3.204, 6.93)    | 0.469        |
|                           |                | Hydralazine vs Nicardipine   | 0.637 (-4.325, 5.599)   | 0.801        |
|                           |                | Labetalol vs Nicardipine     | -1.226 (-3.308, 0.856)  | 0.247        |
|                           | Hispanic       | <b>Antihypertensive used</b> |                         | 0.830        |
|                           |                | Hydralazine vs Labetalol     | 1.167 (-7.651, 9.985)   | 0.794        |
|                           |                | Hydralazine vs Nicardipine   | -0.301 (-8.656, 8.054)  | 0.944        |
|                           |                | Labetalol vs Nicardipine     | -1.468 (-6.216, 3.28)   | 0.543        |
|                           | White          | <b>Antihypertensive used</b> |                         | 0.190        |
|                           |                | Hydralazine vs Labetalol     | 0.986 (-5.873, 7.846)   | 0.777        |

|                             |                 |                              |                          |              |
|-----------------------------|-----------------|------------------------------|--------------------------|--------------|
|                             |                 | Hydralazine vs Nicardipine   | -2.617 (-9.295, 4.062)   | 0.440        |
|                             |                 | Labetalol vs Nicardipine     | -3.603 (-7.557, 0.35)    | 0.074        |
| <b>6-month mortality</b>    | <b>Black</b>    | <b>Antihypertensive used</b> |                          | 0.585        |
|                             |                 | Hydralazine vs Labetalol     | 0 (-Inf, 0.980)          | 0.980        |
|                             |                 | Hydralazine vs Nicardipine   | 0 (-Inf, 0.980)          | 0.980        |
|                             |                 | Labetalol vs Nicardipine     | 0.678 (0.325, 1.415)     | 0.301        |
|                             | <b>Hispanic</b> | <b>Antihypertensive used</b> |                          | 0.757        |
|                             |                 | Hydralazine vs Labetalol     | 0.596 (0.148, 2.392)     | 0.465        |
|                             |                 | Hydralazine vs Nicardipine   | 0.716 (0.198, 2.593)     | 0.611        |
|                             |                 | Labetalol vs Nicardipine     | 1.202 (0.533, 2.711)     | 0.658        |
|                             | <b>White</b>    | <b>Antihypertensive used</b> |                          | 0.053        |
|                             |                 | Hydralazine vs Labetalol     | 0.072 (0.008, 0.659)     | <b>0.020</b> |
|                             |                 | Hydralazine vs Nicardipine   | 0.117 (0.013, 1.044)     | 0.055        |
|                             |                 | Labetalol vs Nicardipine     | 1.62 (0.713, 3.682)      | 0.249        |
| <b>Length of Stay, days</b> | <b>Black</b>    | <b>Antihypertensive used</b> |                          | 0.183        |
|                             |                 | Hydralazine vs Labetalol     | 3.851 (-8.071, 15.772)   | 0.525        |
|                             |                 | Hydralazine vs Nicardipine   | -0.724 (-12.339, 10.891) | 0.902        |
|                             |                 | Labetalol vs Nicardipine     | -4.575 (-9.465, 0.316)   | 0.067        |
|                             | <b>Hispanic</b> | <b>Antihypertensive used</b> |                          | 0.085        |
|                             |                 | Hydralazine vs Labetalol     | 1.084 (-6.439, 8.608)    | 0.777        |
|                             |                 | Hydralazine vs Nicardipine   | -3.545 (-10.655, 3.564)  | 0.327        |
|                             |                 | Labetalol vs Nicardipine     | -4.63 (-8.856, -0.404)   | <b>0.032</b> |
|                             | <b>White</b>    | <b>Antihypertensive used</b> |                          | 0.396        |
|                             |                 | Hydralazine vs Labetalol     | 3.465 (-1.568, 8.498)    | 0.176        |
|                             |                 | Hydralazine vs Nicardipine   | 2.955 (-2.005, 7.916)    | 0.241        |
|                             |                 | Labetalol vs Nicardipine     | -0.51 (-3.61, 2.59)      | 0.746        |
| <b>Discharge mRS</b>        | <b>Black</b>    | <b>Antihypertensive used</b> |                          | 0.352        |
|                             |                 | Hydralazine vs Labetalol     | 1.494 (0.405, 5.503)     | 0.547        |
|                             |                 | Hydralazine vs Nicardipine   | 0.986 (0.275, 3.541)     | 0.983        |
|                             |                 | Labetalol vs Nicardipine     | 0.66 (0.373, 1.168)      | 0.154        |
|                             | <b>Hispanic</b> | <b>Antihypertensive used</b> |                          | <b>0.037</b> |
|                             |                 | Hydralazine vs Labetalol     | 1.132 (0.423, 3.03)      | 0.805        |
|                             |                 | Hydralazine vs Nicardipine   | 0.556 (0.217, 1.426)     | 0.222        |
|                             |                 | Labetalol vs Nicardipine     | 0.491 (0.28, 0.864)      | <b>0.014</b> |
|                             | <b>White</b>    | <b>Antihypertensive used</b> |                          | 0.973        |
|                             |                 | Hydralazine vs Labetalol     | 0.915 (0.264, 3.172)     | 0.889        |
|                             |                 | Hydralazine vs Nicardipine   | 1.002 (0.299, 3.359)     | 0.997        |
|                             |                 | Labetalol vs Nicardipine     | 1.095 (0.496, 2.417)     | 0.822        |
| <b>90-day mRS</b>           | <b>Black</b>    | <b>Antihypertensive used</b> |                          | <b>0.032</b> |
|                             |                 | Hydralazine vs Labetalol     | 7.811 (1.559, 39.141)    | <b>0.012</b> |
|                             |                 | Hydralazine vs Nicardipine   | 4.359 (0.908, 20.924)    | 0.066        |
|                             | <b>Hispanic</b> | Labetalol vs Nicardipine     | 0.558 (0.26, 1.198)      | 0.135        |
|                             |                 | <b>Antihypertensive used</b> |                          | 0.124        |
|                             |                 | Hydralazine vs Labetalol     | 1.059 (0.338, 3.32)      | 0.922        |
|                             |                 | Hydralazine vs Nicardipine   | 0.535 (0.185, 1.552)     | 0.250        |

|                              |                              |                              |                            |                      |       |
|------------------------------|------------------------------|------------------------------|----------------------------|----------------------|-------|
|                              |                              | Labetalol vs Nicardipine     | 0.506 (0.25, 1.022)        | 0.058                |       |
| <b>White</b>                 | <b>Antihypertensive used</b> |                              |                            | 0.934                |       |
|                              |                              | Hydralazine vs Labetalol     | 0.769 (0.189, 3.135)       | 0.714                |       |
|                              |                              | Hydralazine vs Nicardipine   | 0.808 (0.2, 3.258)         | 0.764                |       |
|                              |                              | Labetalol vs Nicardipine     | 1.051 (0.376, 2.941)       | 0.924                |       |
| <b>6-month mRS</b>           | <b>Black</b>                 | <b>Antihypertensive used</b> |                            | 0.691                |       |
|                              |                              |                              | Hydralazine vs Labetalol   | 1.296 (0.241, 6.967) | 0.762 |
|                              |                              |                              | Hydralazine vs Nicardipine | 0.927 (0.181, 4.735) | 0.927 |
|                              |                              |                              | Labetalol vs Nicardipine   | 0.715 (0.332, 1.54)  | 0.391 |
| <b>Hispanic</b>              | <b>Antihypertensive used</b> |                              |                            | 0.053                |       |
|                              |                              | Hydralazine vs Labetalol     | 1.257 (0.365, 4.331)       | 0.717                |       |
|                              |                              | Hydralazine vs Nicardipine   | 0.533 (0.169, 1.685)       | 0.284                |       |
|                              |                              | Labetalol vs Nicardipine     | 0.424 (0.207, 0.871)       | <b>0.020</b>         |       |
| <b>White</b>                 | <b>Antihypertensive used</b> |                              |                            | 0.078                |       |
|                              |                              | Hydralazine vs Labetalol     | 6.505 (1.281, 33.032)      | <b>0.024</b>         |       |
|                              |                              | Hydralazine vs Nicardipine   | 4.407 (0.913, 21.272)      | 0.065                |       |
|                              |                              | Labetalol vs Nicardipine     | 0.678 (0.245, 1.876)       | 0.454                |       |
| <b>12-month mRS</b>          | <b>Black</b>                 | <b>Antihypertensive used</b> |                            | 0.696                |       |
|                              |                              |                              | Hydralazine vs Labetalol   | 1.82 (0.286, 11.6)   | 0.526 |
|                              |                              |                              | Hydralazine vs Nicardipine | 1.336 (0.222, 8.026) | 0.752 |
|                              |                              |                              | Labetalol vs Nicardipine   | 0.734 (0.319, 1.686) | 0.466 |
| <b>Hispanic</b>              | <b>Antihypertensive used</b> |                              |                            | 0.091                |       |
|                              |                              | Hydralazine vs Labetalol     | 0.529 (0.1, 2.788)         | 0.452                |       |
|                              |                              | Hydralazine vs Nicardipine   | 0.272 (0.055, 1.346)       | 0.111                |       |
|                              |                              | Labetalol vs Nicardipine     | 0.515 (0.242, 1.098)       | 0.086                |       |
| <b>White</b>                 | <b>Antihypertensive used</b> |                              |                            | 0.483                |       |
|                              |                              | Hydralazine vs Labetalol     | 2.483 (0.564, 10.925)      | 0.229                |       |
|                              |                              | Hydralazine vs Nicardipine   | 2.023 (0.494, 8.278)       | 0.327                |       |
|                              |                              | Labetalol vs Nicardipine     | 0.815 (0.3, 2.216)         | 0.688                |       |
| <b>Discharge disposition</b> | <b>Black</b>                 | <b>Antihypertensive used</b> |                            | 0.882                |       |
|                              |                              |                              | Hydralazine vs Labetalol   | 0.725 (0.127, 4.144) | 0.718 |
|                              |                              |                              | Hydralazine vs Nicardipine | 0.841 (0.152, 4.666) | 0.843 |
|                              |                              |                              | Labetalol vs Nicardipine   | 1.16 (0.585, 2.298)  | 0.671 |
| <b>Hispanic</b>              | <b>Antihypertensive used</b> |                              |                            | 0.184                |       |
|                              |                              | Hydralazine vs Labetalol     | 1.552 (0.429, 5.611)       | 0.503                |       |
|                              |                              | Hydralazine vs Nicardipine   | 0.75 (0.238, 2.365)        | 0.623                |       |
|                              |                              | Labetalol vs Nicardipine     | 0.483 (0.221, 1.054)       | 0.068                |       |
| <b>White</b>                 | <b>Antihypertensive used</b> |                              |                            | <b>0.007</b>         |       |
|                              |                              | Hydralazine vs Labetalol     | 3.745 (0.767, 18.28)       | 0.103                |       |
|                              |                              | Hydralazine vs Nicardipine   | 0.765 (0.174, 3.368)       | 0.723                |       |
|                              |                              | Labetalol vs Nicardipine     | 0.204 (0.075, 0.555)       | <b>0.002</b>         |       |
